# Supplementary material for: Indirect chiral ligand exchange chromatography for enantioseparation: a modification of conventional techniques
Source: Royal Society of Chemistry journal article supplement (doi:10.1039/c4ra07061e), 2014-09-25
Supplement: c4ra07061e1.pdf [file c4ra07061e1.pdf]

**Indirect Chiral Ligand Exchange Chromatography for Enantioseparation: A modification  
over conventional technique.**

**Rajender Kumar\* and Ravi Bhushan#**

\*Department of Applied Chemistry, Sardar Vallabhbhai National Institute of Technology, Surat-395007 (Gujarat) India. Ph. No: +91-261-2201655 e-mail; [rajenderkumar@ashd.svnit.ac.in](mailto:rajenderkumar@ashd.svnit.ac.in).

#Department of Chemistry, Indian Institute of Technology Roorkee, Roorkee – 247667, India Ph.

+91-1332-285795 Fax: +91-1332-286202, e-mail: [rbushfcy@iitr.ernet.in](mailto:rbushfcy@iitr.ernet.in)

**HPLC**

HPLC was performed on a Lichrospher C<sub>18</sub> (250 X 4.6 mm I.D., 5µm) column from Merck (Darmstadt, Germany). The mobile phase used was methanol-TEAP buffer. The buffer of pH 5 was used for β-blockers while pH 4.3 was used for hydroxy acids, DOPA and carnitine; different ratios of methanol were used in mobile phase. The mobile phase was filtered by membrane filter (0.45 µM) and degassed under reduced pressure prior to use. The separation was carried out at a flow rate of 1 mL/min with run time of 45 minutes with detection at 230 nm on photodiode array detector.

***Validation procedures for analytical separation***

Method validation was done using diastereomeric complexes of atenolol prepared with Cu(II) L-phenylalanine in accordance to ICH guidelines. The calibration curves were obtained by plotting peak areas against concentrations and linear regression equations were used to determine slopes and correlation coefficients. Recovery studies were carried out by analyzing solutions of different known concentrations and mean recovered values (six replicate runs) were represented

as percentage of calculated values. Inter-day (3 days) and intra-day stability studies were carried out to find precision and RSD as shown in Table S-1.

**Table-S-1:** Inter and Intraday Accuracy and Precision of HPLC method for the determination of diastereomers of (*S*) - and (*R*)-atenolol prepared with Cu(II)-(L-Phe)<sub>2</sub> complex, n = 6

| Theoretical<br>conc.(ng/m<br>L) | Measured concentration ( ng/mL)                                     |      |            |                 |                    |      |            |                 |
|---------------------------------|---------------------------------------------------------------------|------|------------|-----------------|--------------------|------|------------|-----------------|
|                                 | <i>S</i> -atenolol                                                  |      |            |                 | <i>R</i> -atenolol |      |            |                 |
|                                 | <i>Intra-day variations ( Six replicates at each concentration)</i> |      |            |                 |                    |      |            |                 |
|                                 | Mean                                                                | ±SD  | RSD<br>(%) | Recovery<br>(%) | Mean               | ± SD | RSD<br>(%) | Recovery<br>(%) |
| 20                              | 21.66                                                               | 0.19 | 0.88       | 108.30          | 19.52              | 0.21 | 1.08       | 97.60           |
| 25                              | 25.84                                                               | 0.21 | 0.81       | 103.36          | 24.79              | 0.24 | 0.97       | 99.16           |
| 30                              | 29.36                                                               | 0.28 | 0.95       | 97.87           | 29.31              | 0.29 | 0.99       | 97.70           |
| 35                              | 34.32                                                               | 0.33 | 0.96       | 98.06           | 34.23              | 0.37 | 1.08       | 97.80           |
| 40                              | 41.47                                                               | 0.39 | 0.94       | 103.68          | 39.41              | 0.33 | 0.84       | 98.53           |
| 45                              | 44.61                                                               | 0.47 | 1.05       | 99.13           | 44.47              | 0.44 | 0.99       | 98.82           |
|                                 | <i>Inter-day variations ( Six replicates at each concentration)</i> |      |            |                 |                    |      |            |                 |
| 20                              | 22.31                                                               | 0.27 | 1.21       | 111.55          | 19.18              | 0.37 | 1.93       | 95.90           |
| 25                              | 26.57                                                               | 0.39 | 1.47       | 106.28          | 24.29              | 0.32 | 1.32       | 97.16           |
| 30                              | 29.09                                                               | 0.36 | 1.24       | 96.97           | 29.03              | 0.43 | 1.48       | 96.77           |
| 35                              | 33.30                                                               | 0.44 | 1.32       | 95.14           | 34.06              | 0.42 | 1.23       | 97.31           |
| 40                              | 39.23                                                               | 0.44 | 1.12       | 98.08           | 39.11              | 0.39 | 1.00       | 97.78           |
| 45                              | 43.69                                                               | 0.47 | 1.08       | 97.09           | 44.20              | 0.49 | 1.11       | 98.22           |
